# Supplementary material for: A novel multi-layer perceptron model for assessing the diagnostic value of non-invasive imaging instruments for rosacea
Source: PeerJ. 2022 Aug 17;10:e13917. doi: 10.7717/peerj.13917 (PMC9392450; doi:10.7717/peerj.13917)
Supplement: Supplemental Information 4 — The demographic characteristics and main imageological features of the 3 types of instruments in rosacea and control group before statistical analysis. [file peerj-10-13917-s004.xlsx]

## Sheet: Raw data_revised
Diagnosis (0 for control, 1 for rosacea)	Gender (0 for female, 1 for male)	Age (years)	Clinical Inspection		RCM																						VISIA													Demoscopy
			Fixed erythema (1 for yes, 0 for no)	Phymatous (1 for yes, 0 for no)	Epidermis						Interface changes (1 for yes, 0 for no)	Percentage of follicle affected by Demodex mites (superficial)	Percentage of follicle affected by Demodex mites (deep)	max ＞3 Demodex mites in single follicle (superficial; 1 for yes, 0 for no)	max ＞3 Demodex mites in single follicle (deep; 1 for yes, 0 for no)	Density of blood vessels (level 0-3)	Thickness of vessels (1 for yes, 0 for no)		Vascular morphology (1 for yes, 0 for no)						Vasodilation (level 0-3)	Blood flow speed (level 0-4)	Background erythema (level 0-3)									Visible capillary (1 for yes, 0 for no)	Overall erythema (level 0-3)	Papules (level 0-4)	Pustules (level 0-2)	Background (1 for yes, 0 for no)			Follicular findings (1 for yes, 0 for no)			Density of blood vessels (level 0-2)	Distribution of vessels (1 for yes, 0 for no)
					Stratum corneum abnormality (1 for yes, 0 for no)	Cell border（0 for clear, 1 for vague）	Spongiform edema（level 0-2）	Thickness of epidermis (um)	Pigment cords (1 for yes, 0 for no)	Pigment rings (level 0-2)							Thin	Thick	Dotted	Curved	Linear	Branched	Reticular	Striaight			Forehead	Intercilium	Superciliary arch	Cheek	Perioral	Chin	Periorbital	Nose	Preauricular					Yellow	White	Reddish	Yellowish halo	Dilation of orifice	Pustules		Uniform dispersion (0 for no, 1 for yes)	Focal or uneven (0 for no, 1 for yes)	Circling the follicle (0 for no, 1 for yes)
0	0	27	1	1	0	0	0	78	0	2	0	0	0	0	0	0	0	0	0	0	1	0	0	0	0	2	0	1	0	1	0	0	0	1	0	1	1	2	0
0	0	44	1	0																							0	1	0	2	0	0	1	1	0	0	3	3	0
0	0	43	1	1	0	1	1	29	0	1	1	0.416667	0.235294	1	1												1	1	1	2	1	0	1	1	0	0	2	0	0
0	0	39	1	0	0	0	1	30	0	2	0	0	0	0	0												0	1	0	1	0	0	1	1	0	0	1	2	0
0	0	50	1	0	0	0	1	70	1	2	0	0	0	0	0												1	1	0	1	0	0	1	1	0	0	1	2	0
0	1	55	1	0	1	1	2	83	0	2	0						0	0	1	0	1	0	0	0	2	4	2	1	0	2	0	0	1	1	0	1	2	2	1
0	0	41	1	0	0	0	1	44	0	2	0	0.5	0.5	1	1	2	0	0	0	0	1	0	0	0	1	3	0	0	0	1	0	0	0	0	0	0	1	2	1
0	0	35	1	1	0	0	1	60	0	2	0	0	0.222222	0	0	0	0	0	0	0	1	0	0	0	0	2	0	0	0	1	0	0	1	1	0	1	1	2	0
0	0	41	1	0	1	1	2	80	0	1	1	0.166667	0.25	1	1	3	0	0	0	0	1	0	0	0	0	4	2	2	2	2	1	0	1	1	0	1	2	3	0
0	0	31	1	1	1	1	0	55	0	2	0	0	0.117647	0	0		0	0	0	0	1	0	1	0	1	3	0	2	0	2	2	0	1	2	0	1	3	3	2
0	0	30	1	0	0	0	0			0	0	0.166667	0.4	0	0												1	1	1	2	2	0	0	2	0	1	2	3	0
0	0	19	1	1	1	0	2	52	1	2	0	0	0	0	0		0	0	0	0	1	0	0	0	0	2	0	1	1	1	1	0	0	1	0	1	1	2	0
0	0	20	1	0																							1	1	0	1	1	0	0	2	0	1	2	2	2
0	0	33	1	0																							0	0	0	1	0	1	1	2	0	0	2	2	0
0	0	45	1	1	1	1	2		0	2	0	0.166667	0.214286	0	0		0	0	0	0	1	0	0	0	0	2	0	2	1	2	0	0	0	1	0	0	2	2	1
0	0	27	0	0	0	0	0	58	0	0	0	0.125	0.166667	1	1		0	0	0	1	1	0	0	0	3	0	0	0	0	2	0	0	1	1	0	1	2	2	0
1	0	20	1	1	0	0	0			0	0	0		0													0	0	0	1	2	0	0	1	0	1	2	3	2	0	1		0	0	0	2	1	0	0
0	0	22	1	0	0	0	1	57	0	0	0		0		0	0	0	0	0	0	1	0	0	0	0	3	0	0	0	1	0	0	0	1	0	1	1	1	0
1	0	36	1	1	0	0	1		0	2	0	0.0625	0.333333	0	1	3	0	0	1	0	1	0	0	0	2	4	1	1	1	1	0	0	1	2	0	0	2	2	0	1	1		0	0	0	0	0	1	0
1	0	48		0																																0				0	0	1	0	0	1	2	0	1	1
1	0	41	1	0	0	1	1		0	0	0	0.1	0.133333	1	1												1	0	0	2	0	0	1	0	0	0	2	1	0	0	0	1	0	0	0	2	1	0	0
1	0	24		0																																				0	0	0				0			0
0	1	73	1	0																							0	1	2	2	0	0	1	2		0	2	2	0	1	1		0	0	0	0	0	1	0
1	0	42	1	1	0	0	0	74	0	0	1	0.0833333	0.117647	1	1	2	0	0	0	0	1	0	0	0	1	3	2	2	1	2	1	0	1	2	1	0	3	4	0	1	0	1	0	0	0	2	1	0	0
0	1	23	0	0	0	0	0	80	1	2	0	0	0	0	0	3	0	0	0	0	1	0	0	0	3	4														0	1		1	1	0	0			1
0	0	21	1	1	1	1	2		0	1	0	0	0	0	0	0	0	0	0	0	1	0	0	0	1	2
1	0	35	1	0																							0	1	1	1	0	0	1	1	0	1	1	2	2	0	0	1	0	0	0	0	0	0	0
1	1	26	1	0	1	1	0		0	2	0	0	0	0	0	3	0	0	0	0	1	0	0	0	1	4	0	2	1	2	2	0	1	1	0	0	3	4	2	0	0	1	0	0	1	2	1	0	1
0	0	30	1	0																							0	0	0	1	2	0	1	1	1	0	2	2
0	1	17	0	0																							1	0	0	1	0	0	0	2	0	0	3	2	2
1	0	29	1	1	0	0	1		1	1	0	0.166667	0.214286	0	1		0	0	0	1	1	1	0	0	0	2	1	2	1	2	1	0	0	2	0	1	2	2	0	0	0	1	0	1	0	2	1	0	0
1	0	57	1	0	1	1	1		0	0	1	0	0.0588235	0	0	2	0	0	0	0	1	1	0	1	3	2	1	0	0	2	0	0	1	1	0	1	3	1	0	1	0	0	0	0	0	2	1	0	0
1	0	21	1	0																							1	0	0	1	0	0	0	2		1	3	2	1	0	0	0				0			0
0	0	63	1	0	1	1	1		0	2	1	0	0	0	0	1	0	0	0	0	1	0	0	0	3	4	2	1	2	2	1	0	2	1	0	0	2	2	0	1	0	1	0	0	0	2	0	1	0
0	1	28	1	0	1	1	1		0	2	0	0.1	0.166667	0	0		0	0	0	1	1	0	0	0	3	4	1	2	1	2	2	0	1	2	0	0	2	3	1	0	0	1	0	0	0	2	0	1	0
0	1				1	1	2		0		0	0		0			0	0	0	0	1	1	0	1	1	3
1	0	47	1	0	0	0	1		0	0	0	0	0.0555556	0	0	2	0	0	0	0	1	1	1	1	0	4	0	1	1	2	1	0	1	2	0	1	2	3	0	1	1		1	0	0	2	1	0	0
1	0	35	1	0																							0	0	0	1	0	0	1	2		1	2	0	0	0	0	0				0			0
0	1	47	1	0																							0	1	0	1	1	0	1	1	0	0	1	2	0
1	0	37	1	0	1	1	2	50	0	0	0	0	0.125	0	0	1	0	0	0	0	1	0	0	0	0	3	0	0	1	1	0	1	1	0	0	0	1	1	0	0	0	1	0	0	0	2	1	0	0
1	0	61	1	0	1	1	2		0	2	0	0	0	0	0	1	0	0	0	0	1	0	0	0	0	2	2	1	1	2	1	0	2	1	0	1	3	0	0	1	0	1	0	0	0	2	1	0	0
1	0	42	1	1	0	0	1	65	0	0	0	0	0.142857	0	0	2	0	0	0	1	1	0	0	0	3	4	2	2	2	2	0	1	2	2	0	1	2	1	0	0	0	1	0	0	0	2	1	0	0
0	0	35	0	0																							0	0	0	1	0	0	0	0	0	0	1	2	0	0	1		0	0	0	0			1
0	0	19	1	0	0	0	1	70	0	1	1	0.333333	0.333333	1	1	2	0	0	1	0	1	0	0	0	1	3														0	0	1	0	0	1	0	0	1	0
0	0	64	1	1	1	1	2	73	0	0	1	0.2	0.25	0	0	2	0	0	0	0	1	1	0	1	0	3	2	2	1	2	0	1	2	2	0	1	3	3	2
1	0	34	0	1	0	0	0		0		0	0	0	0	0	0	0	0	0	1	1	0	0	0	0	2	0	0	0	0	0	0	0	0	0	1	0	0	0	0	1		0	0	0	0			0
0	0	33	1	0																							1	1	1	1	0	1	1	0	0	1	1	2	0
1	0	30	1	0	0	0	1		0	0	1	0.0833333	0.125	0	0	2	0	0	0	0	1	0	0	0	3	4	1	1	0	2	0	0	2	1	0	0	2	2	0	1	1		0	0	0	0	0	1	1
1	0	17	1	0	0	1	0	60	0	0	0	0	0.222222	0	0	2	0	0	0	0	1	1	0	1	0	4	1	0	0	1	1	0	0	1	0	1	1	2	2	0	1		0	0	0	0	0	1	1
0	0	28	1	0	0	1	0		0		1					2	0	0	0	0	1	1	0	1	3	4	2	2	2	2	2	0	2	2	1	1	3	0	0	0	1		0	0	0	2	1	0	0
0	1	26	0	0	1	0	1			0	0	0		0		3	0	0	1	0	1	0	0	0	3	4	2	2	2	2	2	0	1	2	1	0	3	4	2	0	1		0	1	1	2	0	1	1
0	0	21	0	0																							0	0	0	0	0	0	0	0	0	0	0	2	1	0	1		0	0	0	0			0
0	0	18	1	1	0	0	1	64	0	0	0	0.1	0.214286	1	0	0	0	0	0	0	1	0	0	0	0	2	0	0	0	2	2	0	0	2	0	0	2	0	0
1	1	24	1	0																							1	0	1	1	0	0	1	1	0	0	1	2	0	0	1		0	0	0	0	0	1	0
0	0	22		0
1	0	44	1	0																							1	2	1	2	1	0	1	2	0	0	3	2	0	1	0	0	0	0	0	2	1	0	0
0	0	29	1	0	0	1	0		0		1	0	0	0	0	0	0	0	0	0	1	0	0	0	0	2	2	2	1	2	1	0	2	2	0	0	3	2	0	1	0	1	0	0	0	2	0	1	0
1	0	28	1	0																							1	1	0	1	0	0	1	1	0	0	1	2	1	0	1		1	1	0	0	0	0	0
0	1	18	0	0	0	0	2	73	0	2	0	0.0833333	0	1	0	3	0	0	0	0	1	0	0	0	0	3	2	2	2	1	1	0	1	1	0	0	2	4	2	0	1		0	0	0	2	0	1	1
0	0	27	0	0																							0	0	0	1	0	0	1	1	0	0	1	1	0	0	1		0	0	0	0	0	0	0
0	0	23	1	0	0	1	1	68	0	2	0	0.0714286	0.0625	1	0	3	0	0	0	0	1	1	1	1	1	4	0	2	0	1	0	1	1	1	0	1	2	4	1	1	1		0	0	1	2	0	1	1
1	0	23	1	0																							0	1	1	2	0	1	0	1	1	1	2	1	0	0	1		0	0	0	2	1	0	0
0	0	26	1	0	1	1	2	60	0	2	0	0	0	0	0	0	0	0	0	0	1	0	0	0	0	3	1	1	0	1	2	0	1	2	0	1	2	2	2	0	1		1	0	0	0			0
0	0	19	0	0																							2	2	2	2	0	1	1	1	1	1	2	4	2	1	1		0	0	0	2	0	1	1
0	0	34	0	0
0	1	18	0	0																							0	1	0	1	0	0	0	0	0	0	1	3	2
1	0	22	1	0																							1	1	1	1	0	0	1	1	0	1	1	2	0	0	1		0	0	0	0	0	0	0
1	0	11	1	0																							0	0	0	2	0	0	0	2	0	0	3	2	2	0	0	0				0			0
1	1	55	1	1	1	1	2	64	0	2	0	0	0	0	0		0	0	0	1	1	1	0	0	0	2	0	2	2	2	0	0	1	2	0	0	3	2	2	1	0	1	0	0	0	2	1	0	0
0	0	16	1	0																							1	1	1	1	0	0	0	2	0	0	2	3	2
1	0	24		0																																				0	0	1	0	0	0	0	0	0	0
0	0	25	0	0																							0	0	0	0	0	0	0	0	0	1	0	4	2	0	1		0	0	1	2	0	1	1
1	0	23	1	0	0	0	1	64	0	0	0	0.4	0.461538	1	0	2	0	0	0	0	1	1	0	1	1	4	0	0	0	1	0	0	1	0	0	0	1	2	0	0	1		0	0	0	2	1	0	0
0	0	22	0	0	0	0	1		0	0	0	0	0	0	0	0	0	0	0	0	1	0	0	0	0	2	0	0	0	0	0	0	1	1	0	0	0	2	1	0	1		0	0	0	0			0
1	0	23	1	0	0	1	1	78	0		0	0.125	0.4	1	1	2	0	0	0	0	1	1	0	1	0	4	2	2	2	2	2	0	2	0	0	1	3	4	2	0	1		0	0	1	0	0	1	0
1	0	47	1	1	0	1	1	82	0	0	0	0	0.375	0	1	2	0	0	0	0	1	1	0	1	1	2	2	2	2	2	2	0	1	2	0	0	3	4	2	0	0	1	0	0	0	2	1	0	0
0	0	23	0	0	0	1	1		0	0	0	0	0	0	0	0	0	0	0	0	1	0	0	0	0	2	0	0	0	0	0	0	0	0	0	0	0	1	1	0	1		0	0	0	0			0
0	0	29	0	0	1	0	1		0	2	0	0.333333	0.363636	0	0	0	0	0	0	0	1	0	0	0	0	2	0	0	0	1	0	0	0	0	0	0	1	1	0	1	1		0	0	1	1	1	0	0
0	0	27	0	0	0	0	1	42	0	2	0	0	0	0	0	0	0	0	0	0	1	0	0	0	0	2	0	0	0	0	0	0	0	0	0	0	0	1	1	1	1		0	0	0	0	0	1	0
0	0	26	0	0																							0	0	0	0	0	0	0	0	0	1	0	2	0	0	1		0	0	0	0	0	1	0
0	0	29	0	0																							0	0	0	0	0	0	0	0	0	0	0	1	0
0	1	23	0	0	1	1	1	52	0	2	0	0	0	0	0	0	0	0	0	0	1	0	0	0	0	2	0	0	0	0	0	0	0	0	0	0	0	0	0	1	1		0	0	0	0			0
0	0	25	0	0	0	0	1		0	2	0	0	0	0	0	0	0	0	0	0	1	0	0	0	0	2	0	0	0	0	0	0	0	0	0	1	0	2	0	0	1		0	0	0	2	0	0	1
0	0	25	0	0	0	1	1		0	0	0	0	0	0	0	0	0	0	0	0	1	0	0	0	0	3	0	0	0	1	0	0	0	0	0	0	1	2	0	1	1		0	0	0	0	0	1	0
1	1	18	1	0																							0	0	0	0	0	0	0	2	0	1	3	1	0	0	0	0				0			0
1	0	25	1	1	0	0	0		0	2	0																0	0	0	0	0	1	0	0	0	0	1	3	0	0	0	1	1	1	0	0	1	0	0
1	0	21	1	0	0	1	0		0	0	0	0	0.333333	0	0	0	0	0	0	0	1	0	0	0	0	2	0	1	1	1	0	0	0	0	0	1	1	2	0	0	1		1	0	0	2	1	0	0
1	0	42	1	0																							2	2	0	2	0	0	0	0	0	1	3	2	0	1	0	1	0	0	0	2	1	0	0
1	0	29	1	0																							0	1	1	2	0	0	0	1	0	1	2	0	0	0	1		0	0	0	1	0	1	0
0	0	42	0	0																							0	0	0	1	0	0	1	0	0	1	0	2	0
1	0	25	1	1	0	1	1	69	0	2	0	0	0.125	0	1	0	0	0	0	0	1	0	0	0	0	2	0	0	0	1	0	0	0	2	0	1	2	3	1	0	0	0				0			0
1	0	24	1	0	0	0	1	69	0	0	0	0	0.3125	0	1	0	0	0	0	0	1	0	0	0	0	4	0	1	1	1	0	0	0	0	0	1	1	2	0	1	1		0	0	0	2	1	0	0
1	1	55	1	1	0	1	1	73	0	2	1	0	0	0	0	0	0	0	1	0	1	1	0	1	3	4	0	2	2	2	0	0	1	2	0	0	2	2	2	1	0	0	0	0	0	2	0	1	0
1	0	36	1	0	0	0	1		0	1	0	0	0.25	0	0	0	0	0	0	0	1	0	0	0	0	2														0	0	1	0	0	0	2	1	0	0
1	0	53	1	1	0	0	1	46	0	0	0	0.571429	0.4	1	1	1	0	1	0	0	1	1	0	1	3	1	2	1	1	2	1	1	1	1	1	1	3	1	2	1	0	0	0	0	0	2	1	0	0
0	0	24	0	0	0	1	1	83	1	2	0	0.25	0.2	0	0	0	0	0	0	0	1	0	0	0	0	3	0	0	0	0	0	0	0	0	0	0	0	1	0	0	1		0	0	0	0			0
1	0	24	1	0	0	1	2	46	0	0	0	0.375	0.307692	1	1	0	0	0	0	0	1	0	0	0	0	2														0	1		0	0	0	0	0	0	0
0	0	23	0	0	0	0	2	65	0	0	0	0.333333	0.25	0	0	0	0	0	0	0	1	0	0	0	0	3	0	0	0	0	0	0	0	0	0	1	0	4	0	0	1		0	0	0	0	0	0	0
1	0	25	0	0																							0	0	0	1	0	0	0	0	0	1	1	3	0	0	1		0	0	0	0			0
1	0	44	1	0																							2	2	2	2	0	1	2	1	0	1	3	3	1	1	1		0	0	0	2	1	0	0
1	1	18	1	0																							1	1	1	2	2	0	0	2	1	1	2	2	2	0	0	1	0	0	0	2	1	0	0
1	0	41	1	1	0	0	0	58	0	0	0	0.2	0.25	0	0	2	0	0	0	0	1	1	0	1	2	0	1	1	1	2	0	1	1	1	1	1	2	4	0	1	1		0	0	0	0	1	0	0
0	0	48	1	0																							0	1	1	1	0	0	1	2		0	3	2	1	0	0	0				0			0
0	0	14	1	0																							0	1	1	1	0	1	2	1	0	0	3	2	2
1	0	38	1	0																							0	2	0	2	0	1	2	2	0	0	3	3	2	0	0	1	0	0	1	2	1	0	0
0	1	24	1	1	1	1	1	74	0	2	1	0	0.25	0	0	2	0	0	0	0	1	0	0	0	0	3	1	0	1	2	0	0	0	2	1	1	3	2	2	1	0	1	0	0	1	2	0	1	0
1	0	25	1	0	1	1	1		0	2	0	0.222222	0.538462	1	0	0	0	0	0	0	1	0	0	0	0	2	0	1	1	2	0	1	1	1	0	0	2	2	0	0	1		0	0	0	2	1	0	0
0	0	35	0	0																							0	0	0	0	0	1	0	0	0	0	1	3	0	1	1		0	0	0	0			0
0	0	41		0
1	0	24	1	1	0	1	2	57	0	2	0	0.166667	0.142857	0	1	1	0	0	0	0	1	1	0	1	1	3	0	0	0	1	0	1	0	2	0	1	2	2	2	0	0	1	0	0	0	0	1	0	0
0	0	53	1	1	1	1	1	52	0	0	0	0	0.230769	0	0	2	0	0	0	0	1	1	0	1	0	3	1	1	1	2	0	1	2	2	0	1	2	2	1	0	1		0	0	0	2	1	0	0
0	1	11	1	0	1	1	2	74	0	0	0	0	0	0	0	0	0	0	0	0	1	0	0	0	0	2	0	0	0	1	0	0	1	0	0	0	1	0	0	0	1		0	0	0	0			0
0	0	39	1	0																							2	2	2	2	2	0	1	2	0	0	3	4	2
1	0	24	1	0																																				0	1		0	0	0	0	0	1	0
1	0	15	1	1	1	1	2		0	0	0	0	0	0	0	2	0	0	0	0	1	1	0	1	0	4	0	1	1	2	0	1	2	0	0	1	2	2	2	0	1		0	0	0	0	0	0	0
0	1	27	1	0	1	1	2		0	2	0	0.5	0.666667	1	1	3	0	1	0	0	0	0	0	0	3	4	0	0	0	2	0	0	0	2	0	0	3	4	2	1	0	1	0	0	1	2	0	1	0
1	0	22	1	1	0	0	1	62	0	2	0	0.25	0.222222	0	0	3	0	1	1	0	0	0	0	0	3	4	1	0	0	2	2	0	1	2	0	1	3	4	2	1	0	1	0	0	0	0			0
0	0	51	0	0	0	1	2	67	0	0	0	0	0.153846	0	0	0	0	0	0	0	1	0	0	0	0	2	0	0	0	0	0	1	1	0	0	0	1	2	0	1	1		0	0	0	0	0	0	0
0	1	21	1	0	0	1	1		0	2	0	0.181818	0.25	0	0	2	0	0	0	0	1	0	0	0	0	2	1	0	0	2	0	1	0	0	0	1	2	2	0
0	0	15	1	0	1	1	2	49	0	2	0	2	0.416667	0	0	1	0	0	0	1	1	0	0	0	0	3	0	2	2	2	0	0	0	0	0	1	3	2	2	1	0	1	0	0	0	2	0	1	0
1	0	45	1	1	0	0	1	69	0	0	0	0.222222	0.333333	1	1	3	0	0	0	0	1	1	1	1	3	3	1	1	1	2	2	0	1	2	0	0	3	4	2	1	0	0	0	0	0	2	1	0	0
1	0	11	1	0																							0	1	1	1	0	1	1	0	0	0	1	2	2	0	0	1	0	0	0	0	0	1	0
0	0	47	0	0	0	0	1	32	0		1	0.142857	0.1	0	0	3	0	0	0	0	1	1	0	1	3	4	0	0	0	0	0	0	0	2	0	0	3	0	0	0	0	0				0			0
0	0	23	0	0	0	0	1	50	0	2	0	0	0.230769	0	0	1	0	0	0	0	1	0	0	0	0	3	0	0	0	0	0	0	0	0	0	0	0	4	2	0	0	0				0			0
1	0	20	1	0	0	0	1	76	0	2	0	0.153846	0.214286	0	0	2	0	0	0	0	1	1	0	1	0	4	1	0	0	2	0	1	1	0	0	1	3	3	2	0	1		0	0	0	0	0	1	0
1	0	50	1	0	0	1	1	66	0	0	0	0.111111	0.166667	1	1	3	0	0	1	0	1	0	0	0	3	4	0	1	0	2	0	1	0	1	0	0	3	3	2	0	0	1	0	0	0	2	1	0	0
1	0	27	1	1	0	0	1	64	1		0	0	0	0	0	1	0	0	0	0	1	0	0	0	0	3	2	2	2	2	0	1	1	1	0	0	2	3	2	0	0	1	0	0	0	2	1	0	0
0	0	43	1	0	0	0	1	37	0	2	1	0	0.25	0	1	2	0	1	0	0	1	0	0	0	3	0	2	2	2	2	2	0	2	2	0	0	3	2	2	0	1		0	0	0	2	0	1	0
0	0	40	1	0																							0	1	0	1	2	0	1	2	0	0	2	3	2	1	0	1	0	0	0	2	0	1	1
1	0	33	1	0	0	1	1	65	0	2	1	0	0	0	0	3	0	0	0	0	1	1	1	1	1	3	1	2	2	2	0	1	1	1	0	1	2	3	2	1	0	1	0	0	1	2	0	1	0
1	0	27	1	0	0	1	1	64	0	0	0	0.166667	0.25	0	0	0	0	0	0	0	1	0	0	0	0	2	0	0	0	2	0	1	2	1	0	1	2	4	2	0	1		0	0	0	2	1	0	0
0	0	27	1	1	1	1	2	69	0	1	0	0	0.333333	0	0	0	0	0	0	0	1	0	0	0	0	2	1	1	1	1	1	0	1	1	0	0	1	2	0	0	1		1	0	0	0			0
1	0	41	1	0																							1	1	1	1	1	0	1	1	0	1	1	2	2	0	1		0	0	0	0	0	1	0
1	0	34	1	1	0	0	1	57	0	0	0	0	0	0	0	2	0	0	0	0	1	1	0	1	0	1														0	0	1	0	0	1	2	1	0	1
1	0	20	1	0																							1	1	1	1	0	1	0	1	0	1	1	2	0	0	0	1	0	0	0	2	1	0	0
1	0	28	1	0	0	1	1	88	0	0	0	0	0	0	0	0	0	0	0	0	1	0	0	0	0	2	0	1	1	1	2	0	1	1	0	1	3	4	2	0	0	0				0			0
1	1	56	1	1	1	0	1		0	2	0	0.181818	0.142857	1	1	2	0	0	0	0	1	1	0	1	0	2	1	1	1	2	1	0	2	2	0	1	2	2	0	1	0	0	0	0	0	2	1	0	0
1	0	22			0	0	2	54	0	1	0	0	0	0	0	1	0	0	0	0	1	1	0	1	0	2														0	0	1	0	0	0	0			0
1	0	35	1	0	0	0	1	51	0	0	0	0	0	0	0	2	0	0	0	0	1	1	0	1	0	3	0	0	0	2	0	1	2	1	0	1	2	4	0	1	0	0	0	0	0	0	0	1	0
1	0	15	1	0	0	1	1	63	0	2	0	0	0	0	0	2	0	0	0	0	1	1	0	1	0	3														0	1		1	1	0	2	1	0	0
1	0	45	1	0																																				1	0	0	0	0	0	2	1	0	0
1	1	50	1	0	0	0	1	55	0	0	0	0	0.2	0	1	1	0	0	0	0	1	1	0	1	0	2														1	1		0	0	0	2	1	0	0
1	0	24	1	0	0	0	0		0	0	0	0.363636	0.307692	1	1	0	0	0	0	0	1	0	0	0	0	2														0	0	1	0	0	0	2	0	1	0
0	0	44			0	1	1	66	0	0	0	0.0909091	0.142857	0	0	3	0	0	0	0	1	1	1	1	1	3
1	0	45	1	0	0	1	2	67	0	0	0	0	0	0	0	2	0	0	0	0	1	1	1	1	1	3										1				1	0	1	0	0	1	2	1	0	0
1	1	38	1	1	0	1	2	70	1		0	0	0	0	0	3	0	0	1	0	1	1	1	1	0	3														0	0	0				0			0
1	0	36	1	0	1	1	2	57	0	0	0	0	0	0	0	3	0	0	0	0	1	1	1	1	0	3	1	1	1	1	0	1	0	1	0	1	3	4	2	0	1		0	0	0	2	1	0	0
1	0	19	1	1	0	1	2	68	0	2	0	0.384615	0.428571	0	1	2	0	0	0	0	1	1	1	1	0	2														0	1		0	0	0	0	0	0	0
1	0	32	1	0																																				0	1		0	0	0	0			1
1	0	38	1	1	0	0	1	76	0	2	0	0.5	0.214286	1	1	3	0	0	0	0	1	1	1	1	1	4														0	1		1	0	0	0	0	1	0
1	0	53	1	0	0	0	0	60	1	0	1	0	0	0	0	3	0	0	0	0	1	1	1	1	1															0	0	0				0			0
1	0	24	1	0																																				0	1		0	0	1	0	0	0	0
1	0	21	1	0	1	1	2	61	0	0	0	0.222222	0.25	1	1												0	1	1	1	0	1	0	1	0	1	1	2	2	0	1		0	0	1	0	0	0	0
0	1	64	1	0																																0				1	0	1	0	0	0	2	0	1	0
1	0	27	1	1	1	1	1	55	0	2	0	0	0.166667	0	1	1	0	0	0	0	1	1	0	1	0	3										0				1	1		0	0	0	0			0
1	1	27	1	1	1	0	2		0	2	0	0.2	0	1	0	1	0	0	0	0	1	0	0	0	0	4										0				1	0	1	0	0	0	0	0	1	0
0	0	18	1	0	0	1	0	61	0	0	0	0.2	0.3125	1	1	2	0	0	0	0	1	1	0	1	0	3														0	0	0				0			0
1	0	25	1	0	1	1	2	55	0	0	0	0	0	0	0	3	0	0	0	0	1	1	1	1	0	3										1				0	1		0	0	1	0	1	0	0
1	0	32		0																																				0	0	1	0	0	0	0	1	0	0
0	1	27	1	0	1	0	2	58	0	1	0	0.222222	0.3	0	1	2	0	0	1	0	1	0	0	0	3	4														1	0	1	0	0	0	2	0	1	0
1	0	19	1	0	1	1	1	54	1	2	0	0.2	0.2	1	1	0	0	1	0	0	1	0	0	0	3	4	2	2	2	2	0	1	1	2	0	1	2	3	2	1	1		0	0	1	1	0	1	0
1	0	44	1	0																																				1	0	0	0	0	0	1	1	0	0
0	0	53	0	0																																				1	1					0	0	1	0
1	0	53	1	1	0	0	0	59		0	0																													0	1		0	0	0	0			0
1	0	49	1	0	1	1	2		0	2	0	0.454545	0.416667	1	1	2	0	0	0	0	1	1	1	1	0	3	0	0	0	1	0	1	0	2	0	0	3	2	2	0	0	0				0			0
1	0	23	1	0																							0	1	1	1	0	1	0	2	0	1	2	3	2	0	0	0				0			0
1	0	45	1	0	0	0	1	118	1		0	0.272727	0.230769	1	1	0	0	0	0	0	1	0	0	0	0	3	2	2	0	2	0	1	0	0	0	1	2	4	2	0	1					0			1
0	1	32	1	0	0	1	2	82	1	2	0	0	0	0	0	1	0	0	0	0	1	0	0	0	0	3										0				1	1		0	0	0	0	1	0	0
1	0	24	1	0																																				0	1		0	0	0	0	0	1	0
1	0	23		0																																0				0	1		0	0	0	0			0
1	1	21	1	1	1	1	2	71	0	0	0	0.2	0.153846	1	1	0	0	0	0	0	1	0	0	0	0	3														0	1		0	0	0	0	0	1	0
1	1	21	1	0	1	1	2	73	0	2	0	0.153846	0.214286	1	1	0	0	0	0	0	1	0	0	0	0	3	2	2	2	2	0	1	1	0	0	1	3	2	2	0	0	1	1	1	1	0	0	1	0
1	1	56	1	0	0	1	1	92	1	2	0	0.4	0.307692	1	1																									1	1		0	0	0	2	1	0	0
1	0	23	1	0	1	1	2	88	0	1	0	0.166667	0.111111	0	0	0	0	0	0	0	1	0	0	0	0	3	1	1	1	2	0	1	1	0	0	1	2	2	2	0	0	0				0			0
1	0	47		0																																				0	0	0				0			0
1	0	40	1	1	0	0	1	76	0	0	0	0	0	0	0	2	0	0	0	0	1	1	1	1	0	3	0	2	1	2	0	1	1	2	0	1	2	2	2	0	0	1	0	0	1	2	1	0	0
1	0	19	1	0	1	1	1	75	0	0	0	0	0.266667	0	1	0	0	0	0	0	1	0	0	0	0	2	0	0	0	2	0	0	0	0	0	1	3	2	0	0	0	1	0	0	0	2	1	0	0
1	0	36	1	0																							0	1	1	1	0	1	1	1	0	1	3	2	2	0	0	0				0			0
1	0	48	1	0																							2	2	2	2	0	1	1	1	0	1	2	2	0	1	1		0	0	0	0	0	0	0
0	0	48	0	0																							2	0	0	2	2	0	2	0	1	1	3	1	0	0	0	0				0			0
1	0	43	1	0	0	1	1	87	1	2	0	0	0	0	0												0	1	1	2	0	1	2	1	0	0	3	4	2	1	0	0	0	0	0	0	0	1	0
0	0	32	1	0	1	1	2		0	2	1	0.428571	0.411765	1	1	3	0	1	0	0	1	1	0	1	3	4	0	1	1	2	1	0	1	0	0	1	3	0	2	0	0	1	0	0	0	2	0	1	0
1	0	19	1	0	0	0	0	72	0	0	0	0	0.0588235	0	0	0	0	0	0	0	1	0	0	0	0	2	0	1	0	1	0	1	1	0	0	0	1	2	2	1	1		0	0	0	0	0	1	0
1	0	28	1	0	1	1	2	73	0	0	0	0.4	0.5	1	1	0	0	0	1	0	0	0	0	0	0	4	1	1	1	2	0	1	1	0	0	0	3	2	0	0	0	1	0	0	0	0			0
1	0	50	1	0																							0	1	0	2	0	1	0	2	0	0	3	1	0	1	0	0	0	0	0	2	0	1	0
1	0	39	1	0	1	0	1	65	0		0	0.214286	0.2	1	1	0	0	0	0	0	1	0	0	0	0	2														1	0	0	0	0	0	0			0
1	0	21	0	0	0	1	2	82	1	2	0	0	0.125	0	1	0	0	0	0	0	1	0	0	0	0		0	1	0	2	0	1	1	0	0	1	2	2	2	1	1		0	0	0	2	1	0	0
1	0	20	1	0																							1	1	1	2	1	0	1	1	0	1	2	4	0	0	0	1	0	0	0	2	0	1	0
1	0	37	1	0																							2	2	2	2	1	0	2	1	0	0	3	3	2	0	0	0				0			0
1	0	43	1	0	1	1	2	67	0	0	0	0.684211	0.315789	1	1	0	0	0	0	0	1	0	0	0	0	3	1	1	1	2	0	1	2	0	1	1	2	4	2	1	0	0	0	0	0	0	0	1	0
1	1	35	1	0																							0	0	0	1	0	1	1	2	0	0	3	2	0	0	0	0				0			0
1	1	31	1	0																							2	2	2	2	2	0	2	1	0	0	3	4	2	0	1		0	0	0	2	0	1	0
1	0	23	1	0	0	0	1	81	0	0	0	0.2	0.181818	1	1	2	0	0	0	0	1	1	1	1	0	3	0	1	1	2	1	0	0	1	0	1	2	3	2	1	0	0	0	0	0	1	0	1	0
1	0	44	1	1	0	0	0		0	0	0	0.5	0.277778	1	1	1	0	0	1	0	0	0	0	0	0	0	0	0	0	2	1	1	0	2	0	1	3	1	2	0	0	1	0	0	0	2	1	0	0
1	0	24	1	1	0	0	1		0	2	0	0	0	0	0	1	0	0	1	0	1	0	0	0	1	3	0	1	1	1	1	0	1	2	0	1	2	2	1	1	1		0	0	0	0	0	0	0
1	0	39	1	1	0	0	1		0	2	0	0	0	0	0	2	0	0	0	0	1	1	0	1	1	3														1	0	0	0	0	0	0	0	1	0
1	0	30	1	0																							1	1	1	2	1	1	1	1	0	1	2	4	2	1	1		0	0	0	0	0	1	0
1	0	34	1	0	0	0	1	91	0	2	1	0	0.0625	0	0												0	1	1	2	1	0	2	1	0	1	2	2	0	1	1		0	0	0	0	0	1	0
0	1	21	1	0	0	0	1		0	0	0	0	0.4	0	0	0	0	0	0	0	1	0	0	0	0	3	1	0	0	2	1	0	1	1	0	0	2	2	2	0	0	1	0	0	0	2	1	0	0
1	0	21	1	1	0	0	0		0	2	0	0	0.333333	0	0	1	0	0	0	1	1	0	0	0	0	3	1	1	1	1	0	0	1	0	0	1	1	3	1	0	1		0	0	0	2	1	0	0
0	0	23	0	0	0	0	1		0	1	0	0.2	0.2	1	0	2	0	0	0	0	1	0	0	0	1	3	0	1	0	0	0	0	0	0	0	1	1	2	0	1	1		0	0	0	0			0
1	0	50	1	1	0	0	0	63	0	2	0	0	0	0	0	1	0	0	0	0	1	0	0	0	0	3	2	2	2	2	2	0	1	2	0	1	3	2	0	1	0	0	0	0	0	2	0	1	0
1	0	23	1	0	0	0	0	48	0	2	0	0.0625	0	0	0	1	1	0	0	0	0	0	0	0	0	2	0	2	2	2	0	1	1	1	0	1	2	4	2	0	1		1	0	0	0			0
1	0	53	1	0	0	0	0	67	0	2	0	0	0.0666667	0	0	2	0	1	0	0	0	0	0	0	3	4	1	0	0	2	0	0	2	0	0	1	3	1	0	1	1		0	0	0	2	1	0	0
1	0	30	1	0	0	0	1	85	0	0	0	0.0769231	0.25	0	0	2	0	1	0	0	0	1	1	0	2	4	0	0	0	1	1	0	2	1	0	0	3	1	0	1	0	0	1	0	0	0	0	0	0
1	0	20	1	0	0	0	1	94	0	2	0	0.2	0.0909091	1	1	1	0	0	0	0	0	0	0	0	0	4	0	0	0	2	0	0	0	0	0	1	2	4	2	0	0	1	0	0	0	2	0	1	0
0	0	21	0	0	0	0	1		0	0	0	0	0	0	0	2	1	0	0	0	0	0	0	0	0	4	0	1	1	1	0	0	1	1	0	1	1	2	0	0	1		1	0	0	0	0	0	0
0	0	21	0	0	1	0	2	74	0	0	0	0.15	0.0833333	0		1	1	0	0	0	0	0	0	0	0	2	1	1	1	2	1	0	1	1	0	1	3	4	1	1	1		0	0	0	0	0	1	0
0	0	21	0	0	1	0	1	54	0	0	0	0	0.0869565	0	0	1	1	0	0	0	0	0	0	0	0	2	0	0	0	1	0	0	1	0	0	1	1	1	1	1	1		0	0	0	0			0
0	0	22	0	0	0	0	2	76	0	0	0	0.1	0	1	0												0	0	0	1	1	0	1	0	0	0	1	2	0	1	1		0	0	0	0	0	0	0
1	0	28	1	1	0	0	2	52	0	0	0	0	0	0	0	2	0	1	0	0	0	0	0	0	2	4	1	1	1	2	0	1	1	2	0	1	3	4	2	1	0	0	0	0	0	0	0	0	0
1	0	19	1	0	1	0	2	35	0	0	1	0	0.0833333	0	0	3	0	1	0	0	0	0	0	0	3	4	1	1	1	2	0	0	1	1	0	0	3	4	2	0	0	1	1	1	0	1	1	0	0
0	0	50	1	0	0	0	1	58	0	2	0	0	0.238095	0	0	1	1	0	0	0	0	0	0	0	0	1	1	0	1	2	1	0	2	1	0	1	3	3	2	1	0	0	0	0	0	2	1	0	0
0	0	26	0	0	0	0	2	72	0	2	0	0	0.142857	0	0	3	0	1	0	0	0	1	0	0	2	4	1	0	1	1	0	0	1	0	0	0	1	1	0	1	1		0	0	0	0			0
1	0	48	1	1	0	0	2	73	0	0	0	0.0909091	0	0	0	3	0	1	0	0	0	1	0	0	2	4	2	2	2	2	2	0	1	2	0	0	2	2	0	1	0	0	0	0	0	1	0	1	0
1	0	51	1	1	1	0	1		0		0	0	0	0	0												0	0	0	1	0	0	1	2	0	0	3	1	0	0	0	0				0			0
0	0	22	0	0	1	0	0	60	0	0	0	0.0666667	0	0	0											4	1	1	1	1	0	1	2	0	0	0	2	1	0	1	1		0	0	0	0			0
1	0	28	1	0	0	0	0	73	0	2	0	0.142857	0.117647	0	0	2	0	0	0	0	0	0	0	0	0	4	2	0	2	2	0	0	0	0	0	0	3	2	0	0	0	1	1	0	0	2	1	0	0
0	0	21	1	0	0	0	0	84	0	2	0	0	0.15	0	0	3	1	0	0	0	0	0	0	0	0		1	1	1	1	0	0	1	0	0	1	1	2	0	1	0	0	0	0	0	0	0	1	0
0	0	20	0	0																							0	1	1	1	0	1	1	0	0	1	1	3	1	1	1		0	0	0	0	0	1	0
1	0	20	1	0	0	1	1	72	0	2	0	0	0	0	0	0	0	0	0	0	1	0	0	0	0	2	0	0	0	1	0	0	1	0	0	1	1	4	2	1	0	0	0	0	0	0	0	1	0
0	0	17	0	0	1	1	2	64	0	0	0	0	0.047619	0	0	0	0	0	1	0	0	0	0	0	0	3	1	1	1	1	0	0	1	1	0	0	1	4	2	0	1		0	0	0	0	0	1	0
1	0	28	1	0																							0	1	1	2	2	0	1	1	0	1	2	2	0	1	0	0	0	0	0	0	1	0	0
0	0	38	1	0																							2	2	2	2	0	1	2	1	0	0	3	4	1	1	0	0	0	0	0	2	1	0	0
0	1	71	1	0																							1	2	1	2	1	0	2	1	1	0	3	2	0	0	0	0				0			0
1	0	23	1	0																							1	2	2	2	0	0	2	1	0	1	3	2	0	0	0	0				0			0
1	0	54	1	0																							1	1	1	2	0	0	2	1	0	0	3	2	0	0	0	1	0	0	0	2	1	0	0
1	0	37	1	0																																				0	1		1	0	0	2	0	1	0
1	1	46	1	0																							1	1	1	1	1	0	1	2	0	1	3	2	2	0	0	0				0			0
1	1	35	1	0																							1	1	1	1	1	0	1	2	0	0	3	2	1	0	0	0				0			0
1	0	29	1	0																							0	1	1	2	1	0	1	0	0	1	2	2	2	0	0	1	0	0	0	2	1	0	0
1	0	23	1	0	0	0	1	96	0	0	0	0.2	0.2	1	1	3	0	0	1	0	1	0	0	0	1	4	1	1	1	1	1	0	1	1	0	1	1	4	0	1	0	0	0	0	0	0	0	1	0
1	0	27	1	0																							0	1	1	1	0	1	1	1	0	1	2	2	0	1	1		0	0	0	0	0	1	0
0	1	36	1	0																							1	2	1	2	1	0	2	2	0	0	2	4	2	1	0	0	1	0	0	0	0	1	0
1	0	32	1	0																							1	1	1	2	0	1	2	2	0	1	3	3	0	0	1		0	0	0	0	0	1	0
1	0	25	1	1	1	1	2	58	0	2	0	0	0	0	0	2	0	0	1	1	0	0	0	0	0	0	1	1	1	2	1	0	0	2	1	1	3	3	2	0	0	1	0	0	1	2	1	0	0
1	0	25	1	0																							0	2	2	2	2	0	1	1	0	1	3	4	2	0	0	1	0	0	1	2	0	1	0
1	0	20	0	0																							1	0	1	1	0	0	1	0	0	1	1	1	0	0	1		0	0	0	0	0	1	0
1	0	17	1	1	0	0	1	61	0	0	0	0	0.0714286	0	0	0	0	0	0	0	1	0	0	0	0	2														0	0	0				0			0
1	0	34	1	0	1	1	2	82	0	0	1	0	0	0	0	2	0	0	0	0	1	1	0	1	3	4	0	0	0	2	0	0	0	0	0	1	3	1	0	0	0	1	0	0	0	2	0	1	0
0	0	29	1	0																							0	1	0	2	0	1	1	2	0	1	3	2	2							0			0
0	0	19	0	0																							0	2	2	0	0	1	0	0	0	1	3	3	1	0	0	0				0			0
1	0	48	1	0																							0	0	0	2	1	0	2	1	0	0	3	2	0	1	0	0	0	0	0	1	1	0	0
1	0	29	1	0																							0	0	0	1	0	1	2	1	0	1	2	2	0	1	1		0	0	0	0	0	1	0
1	0	31	1	0																							1	0	0	1	1	0	1	1	0	1	1	1	0	1	0	0	0	0	0	1	0	1	0
0	1	20	1	0																							2	2	2	2	1	0	2	1	0	0	3	4	2	0	1		0	0	1	2	0	1	1
1	0	21	1	0																							2	2	2	2	2	0	2	2	1	1	3	4	2	1	1		0	0	0	1	1	0	0
1	0	47	1	0																																				1	1		1	0	0	0	0	1	0
1	0	30	1	1	1	0	1	69	0	2	0	0.222222	0.166667	0	1	0	0	0	0	0	1	0	0	0	0	3	2	2	2	2	2	0	2	2	0	1	3	4	2	0	0	0				0			0
1	0	20	1	0																																				1	0	0				2	1	0	0
1	0	41	0	0																							1	1	1	1	1	0	1	1	0	1	1	3	0	0	1		1	0	0	2	1	0	0
1	0	20	1	0	0	0	1	75	0	0	0	0	0.230769	0	1	0	0	0	0	0	1	0	0	0	0	3	1	2	2	2	0	1	2	2	0	1	2	4	1	1	0	0	0	0	0	2	1	0	0
1	0	24	1	0	0	0	1	75	0	0	0	0	0	0	0	3	0	0	0	0	1	1	0	1	0	4	1	1	1	2	1	0	1	2	0	1	2	4	2	0	1		0	0	0	0	0	1	0
1	0	54	1	1	1	1	2	50	1		1	0.166667	0.214286	0	1	2	0	0	0	0	1	1	0	1	3	3	2	2	2	2	2	0	2	2	0	0	3	4	2	1	0	0	0	0	0	2	0	1	0
1	0	28	1	1	1	0	2	61	0	2	0	0.153846	0.2	1	1	0	0	0	0	0	1	0	0	0	0	2	0	1	1	2	1	0	2	2	0	1	2	2	1	1	0	0	0	0	0	0	0	1	0
1	0	46	1	0																							1	0	1	2	2	0	2	2	0	0	2	4	1	1	0	0	0	0	0	2	0	1	0
1	0	39	1	0																							1	1	1	2	1	0	1	1	0	1	2	4	0	1	0	0	0	0	0	0	0	1	0
1	0	17	1	0																							2	2	2	2	2	0	2	1	0	1	3	4	2	0	0	1	0	0	0	1	1	0	0
1	1	21	0	0																							1	1	1	2	1	0	1	1	0	1	3	4	0	1	0	0	0	0	0	2	1	0	0
0	1	44	1	0																							1	1	1	2	1	0	2	2	0	0	3	1	0	1	0	1	0	0	0	2	1	0	0
1	0	29	1	0	0	1	2	96	0	0	0	0	0.0588235	0	0	0	0	0	0	0	1	0	0	0	1	3	2	2	2	2	2	0	2	1	0	0	3	1	0	0	0	0				0			0
1	1	36	1	0																							1	1	1	1	1	0	1	2	0	1	3	2	2	1	0	1	0	0	0	0	0	1	0
1	0	29	1	0	0	1	2		0	2	0	0.363636	0.357143	1	1	1	0	0	1	0	0	0	0	0	0	2	2	1	2	2	1	0	1	1	0	1	2	4	0	1	1		0	0	0	0	0	1	0
1	1	62	1	0																							0	1	1	1	1	0	1	2	0	0	3	0	0	0	0	0				0			0
1	0	28	1	0																							0	1	1	2	0	1	2	1	0	1	3	2	2	0	0	0				0			0
1	0	35	1	0																							2	1	1	2	0	0	2	0	0	1	2	2	1	0	0	0				0			0
1	0	20	1	0	0	0	1	78	0	0	0	0.333333	0.333333	1	1	3	0	1	0	0	1	1	0	1	3	4	2	2	2	2	0	0	1	1	0	1	2	4	2	1	1		0	0	1	0	0	1	0
1	0	32	1	0																							0	1	1	2	1	0	1	1	0	1	2	3	2	0	1		0	0	0	0	0	1	0
1	0	31	1	1	0	0	1	64	0	2	0	0	0.444444	0	1	2	0	0	0	0	1	0	0	0	0	3	1	1	1	2	2	0	1	2	0	1	2	4	2	0	0	0				0			0
1	0	23	1	0	0	1	1	51	0	1	0	0	0	0	0	0	0	0	1	0	1	0	0	0	0	3	0	1	1	2	0	0	1	1	0	1	2	3	2	0	0	1	0	0	0	2	1	0	0
1	1	65	1	0																							0	0	0	0	0	0	0	2	0	0	3	2	0	0	0	0				0			0
1	0	41	1	0																							0	1	1	2	2	0	1	2	0	1	3	1	1	0	0	0				0			0
1	1	49	1	1	1	0	2	77	0	0	0	0.25	0.388889	1	1	1	0	0	0	0	1	0	0	0	0	3	1	1	1	2	0	0	2	1	0	0	3	2	2	1	1		1	0	0	2	1	0	0
1	1	23	1	0																							1	1	1	2	1	0	1	1	0	0	3	4	1	0	1		0	0	0	0	0	1	0
1	1	39	1	1	0	1	2	73	0	2	0	0	0.214286	0	1	3	0	0	1	0	1	1	0	1	3	4	1	1	1	2	1	0	1	2	0	0	3	4	2	0	0	1	0	0	0	2	1	0	0
1	0	40	1	0																							0	0	0	2	0	0	1	2	0	1	3	2	1	0	0	0				0			0
1	0	31	1	0																							0	0	0	2	0	0	2	0	0	1	3	3	0	1	0	0	0	0	0	1	0	1	0
1	0	55	1	0																							1	1	1	2	2	0	2	1	0	0	2	2	0	0	0	1	0	0	0	1	1	0	0
0	0	30	0	0	1	1	2	54	0	2	0	0	0	0	0	0	0	0	1	0	0	0	0	0	0	2	0	0	0	1	1	0	1	1	0	1	1	3	2	1	1		0	0	0	1	0	1	0
1	0	25	0	0																							1	1	1	1	1	0	2	0	0	1	3	4	1	1	1		1	0	0	0	0	1	0
0	1	30	1	0	1	1	2	82	1	2	0	0	0	0	0	3	0	0	0	1	1	0	0	0	0	2	2	2	2	2	1	0	2	2	0	1	3	2	1	1	0	0	0	0	0	2	0	1	0
0	1	28	0	0																																				0	0	0				0			0
1	0	29	1	1	1	1	2	77	0	2	1	0	0	0	0	3	0	0	1	0	0	0	0	0	3	4	2	2	2	2	1	0	2	1	1	1	3	4	2	0	0	1	1	0	0	0	0	1	0
1	0	30	1	0																							1	1	1	2	1	0	1	1	0	1	3	4	1	0	0	0				0			0
1	0	20	1	0																																				0	0	1	0	0	0	1	1	0	0
1	0	17	1	0																							1	0	0	2	0	0	2	2	0	1	3	2	1	0	0	1	0	0	0	2	1	0	0
1	0	28	1	0																							0	0	0	2	0	0	2	0	0	1	3	2	0	0	0	1	1	0	0	2	1	0	0
1	0	24	1	0																							0	1	1	1	1	0	1	1	0	1	1	2	0	0	0	1	0	0	0	2	1	0	0
1	0	22	1	0																							1	1	1	2	0	0	1	0	0	1	3	2	2	0	0	1	1	0	1	2	1	0	0
0	0	45	1	1	1	1	2		0	0	0	0.0625	0.05	1	1	3	0	0	1	0	1	0	0	0	0	3	2	2	2	2	2	0	2	2	0	0	3	3	0	1	0	0	1	0	0	2	1	0	0
0	0	34	0	0	1	1	2	65	0	0	0	0	0	0	0	0	0	0	1	0	0	0	0	0	0	3	1	1	1	1	1	0	2	1	0	0	2	4	0	0	0	0				0			0
0	0	30	0	0	1	1	2		0	1	0	0	0	0	0	0	0	0	0	0	1	0	0	0	0	2	0	0	0	1	1	0	1	1	0	0	1	3	0	1	0	0				0			1
0	0	31	0	0	1	1	2		0	2	0	0	0	0	0	0	0	0	0	0	1	1	0	1	0	2	1	1	1	1	0	0	1	0	0	1	1	1	0	1	0	0	1	0	0	0	0	1	0
1	0	41	1	0																																				0	0	1	1	0	0	2	1	0	0
1	0	21	1	0	1	1	2	82	0	2	0	0.25	0.222222	0	0	3	0	0	1	1	0	0	0	0	0	3	1	1	1	1	1	0	1	1	0	0	1	4	1	1	0	0	1	0	0	0			0
0	0	48	1	0																							1	1	1	2	0	1	2	2	0	0	3	2	0	0	0	0				0			0
0	0	30	1	0																							1	2	1	2	0	0	2	2	0	1	3	2	2	0	0	0				0			0
1	0	19	1	0	1	1	2	78	0	0	0	0	0	0	0	2	0	0	1	0	0	0	0	0	0	3	2	2	2	2	1	0	1	1	0	1	3	4	0	1	1		1	0	0	1	0	1	0
0	1	29	1	0																							2	2	2	1	1	0	1	1	0	0	2	4	0	0	0	0				0			0
1	0	43	1	0	1	1	2	87	1	2	0	0	0	0	0												1	1	1	2	1	0	2	2	0	1	3	4	2	1	0	0	1	0	0	0	0	1	0
1	0	35	1	1	1	1	2	78	0	1	0	0	0	0	0	2	0	0	0	0	1	1	0	1	3	4														1	0	1	1	0	0	2	1	0	0
1	0	24	1	0																																1				1	0	1	1	0	1	2	1	0	0
1	0	35	1	0																							1	1	1	2	2	0	1	1	0	1	3	4	0	1	0	0	1	0	0	1	1	0	0
1	0	21	1	0																																				0	0	1	0	0	0	2	1	0	0
1	0	42	1	0																							0	1	1	2	1	0	2	1	0	1	3	4	0	1	0	0	1	0	0	0			0
1	1	14	1	0																							0	2	2	2	0	0	2	2	0	1	3	4	2	0	0	1	1	0	0	2	1	0	0
1	0	50	1	0																							2	2	2	2	1	0	1	1	0	1	3	2	0	1	0	1	1	0	0	2	1	0	0
1	0	62	0	0																							0	2	1	2	2	0	1	2	0	0	3	4	1	0	0	0				0			0
1	0	20	1	1	0	1	2		0	0	0	0	0.153846	0	0	1	0	0	0	0	1	1	0	1	0	0	1	1	1	1	0	1	1	1	0	1	1	3	0	0	0	0				0			0
1	0	35	1	0																							1	1	1	1	1	0	1	1	0	1	1	4	0	1	0	0	1	0	0	0	0	1	0
0	0	23	1	0																							0	1	1	2	1	0	2	1	0	1	3	2	1	1	0	0				0			0
0	0	20	1	0																							1	2	1	1	0	0	2	1	0	1	2	4	2	1	0	0	1	0	0	0	0	0	0
1	0	36	1	0	1	1	2	75	0	2	0	0	0	0	0	1	0	0	0	1	0	0	0	0	0	3	0	0	0	2	0	0	1	0	0	0	3	1	0	0	0	1	1	0	0	2	1	0	0
1	0	36	1	0	1	1	2		0	0	0	0	0	0	0	0	0	0	0	0	1	0	0	0	0	3	0	1	1	2	1	0	2	0	0	1	3	3	0	0	0	1	0	0	0	2	1	0	0
1	0	40	1	0	1	0	1	56	0	0	0	0	0	0	0	0	0	0	0	0	1	0	0	0	0	2	0	1	1	1	0	0	1	1	0	1	1	1	1	1	0	0	1	0	0	0	0	1	0
1	1	23	1	0																							1	1	1	2	0	0	1	1	0	0	3	4	2	1	0	0	1	0	0	2	1	0	0
0	0	23	0	0	1	1	2	78	1	2	0	0	0	0	0	0	0	0	0	0	1	0	0	0	0	3														1	0	0	1	0	0	0	1	0	0
1	0	33	1	0																							2	2	2	2	0	1	2	2	0	0	3	4	2	0	0	1	1	0	0	2	1	0	0
1	0	36	1	1	1	0	2	93	0	0	0	0.333333	0.333333	1	1	0	0	0	0	0	1	0	0	0	0	3	1	1	1	1	1	0	1	1	0	1	1	4	2	1	0	0	1	0	0	2	1	0	0
1	0	24	1	0	1	1	2		0	2	0	0	0	0	0	0	0	0	0	0	1	0	0	0	0	3	1	1	1	2	0	1	1	1	0	1	3	1	1	0	0	1	1	0	0	2	1	0	0
0	0	45	1	0																							2	0	0	1	0	0	2	2	0	0	3	2	1	0	0	0				0			0
0	0	49	1	1	0	0	2	90	0	0	0	0	0	0	0	2	0	0	1	0	1	0	0	0	3	4	2	2	2	2	2	0	2	0	1	0	3	0	0	0	0	0				0			0
0	0	20	0	0	1	1	2	73	1	2	0	0	0	0	0	1	0	0	0	0	1	1	0	1	0	3	1	1	1	1	0	0	2	1	0	1	2	2	0	0	0	0				0			0
0	0	46	1	0																							1	0	1	2	1	0	2	1	0	0	3	4	0	1	0	1	1	0	0	2	1	0	0
1	0	34	1	0																							1	1	1	2	0	0	2	1	0	1	3	4	0	0	0	0				0			0
0	1	34	1	0																							2	2	1	2	2	0	2	2	0	0	3	2	0	1	1		1	0	0	0	0	1	0
1	1	18	1	0																							1	0	0	1	0	0	0	1	0	0	1	3	0	0	0	1	1	0	0	2	1	0	0
1	0	39	1	0																							0	1	1	2	0	0	2	0	0	0	2	2	0	0	0	1	1	0	0	0	0	1	0
1	0	27	1	0																							0	1	0	2	0	1	1	0	0	0	3	4	1	0	0	1	1	0	0	2	1	0	0
1	0	41	1	0	0	1	2	67	0	0	0	0	0	0	0	1	0	0	0	0	1	1	0	1	3	2	0	1	1	2	0	0	2	0	0	0	3	0	0	1	0	0	0	0	0	2	1	0	0
1	0	46	1	0																							0	0	0	0	1	0	1	0	0	0	1	4	0	0	0	0				0			0
0	0	33	0	0	1	1	2	79	0	0	0	0	0	0	0	0	0	0	0	0	1	0	0	0	0	0														1	0	0	1	0	0	0	0	1	0
0	0	18	0	0	0	0	1	61	0	0	0	0.05	0.0952381	1	1	1	0	0	0	1	1	0	0	0	0	3														0	0	1	1	0	0	0	0	1	0
1	0	45	1	0	1	0	2		0	1	0	0	0.0769231	0	0	3	0	0	0	0	1	1	1	1	1	3	2	2	2	2	0	0	2	2	0	1	2	1	0	0	0	1	1	0	0	1	1	0	0
1	0	48	1	1	0	0	1	80	0	0	0	0	0.333333	0	0	3	0	0	0	0	1	1	1	1	1	3	1	1	1	2	2	0	1	2	0	0	3	2	1	0	0	1	0	0	0	2	1	0	0
1	0	45	1	1	0	0	0	67	0	0	0	0	0.0454545	0	0	3	0	0	0	0	1	0	0	0	1	3														1	0	0	1	0	0	0	0	1	0
1	0	33	1	0	0	0	1		0	0	0	0	0.0909091	0	0												1	1	1	2	1	0	2	0	0	1	2	2	0	1	1		1	0	0	0	0	1	0
1	0	25	1	0	0	0	1	9	0	0	0	0	0	0	0												0	1	1	1	0	0	1	1	0	1	1	2	0	0	1		1	0	0	1	1	0	0
1	0	38	1	0	0	0	1		0	1	0	0	0	0	0	3	0	0	0	0	1	0	0	0	3	4	2	2	2	2	1	0	2	1	0	1	3	4	0	0	0	0				0			0
1	0	49	1	0	1	0	2	61	0	2	0	0.0769231	0.285714	1	1	3	0	0	0	0	1	1	1	1	1	3	0	2	2	2	0	0	1	1	0	1	3	4	2	1	0	0	1	0	0	2	1	0	0
1	0	25	1	1	1	0	1	9	0	1	0	0.1875	0.25	1	0	1	0	0	0	0	1	0	0	0	1	3														0	0	0				0			0
1	0	36	1	1	0	1	2	49	0	0	0	0	0.0526316	0	0	0	0	0	1	0	1	0	0	0	1	3	1	1	1	2	2	0	1	1	0	1	2	2	0	1	0	1	1	0	1	2	1	0	0
1	0	40	1	0	0	0	1	67	0	0	0	0	0.1	0	0	1	0	0	0	0	1	1	0	1	0	2										0				0	1		0	0	0	1	1	0	0
1	0	21	1	0	0	0	1		0	2	0	0	0.0952381	0	0	1	0	0	0	0	1	0	0	0	0	2	0	0	0	2	0	1	1	1	0	1	3	2	0	0	1		0	0	0	0	0	1	0
1	0	28	1	0	0	0	1	3	0	0	0	0.0454545	0.0384615	1	1	1	0	0	0	0	0	1	0	0	1	3	0	1	1	1	1	0	1	1	0	1	1	2	0	0	0	1	1	0	0	0	0	1	0
1	0	25	1	1	0	0	1	67	0		1	0	0.05	0	0	1	0	1	0	0	1	1	1	1	3	4														0	1		1	0	0	1	1	0	0
1	0	36	1	0	1	0	2	85	0	2	0	0	0.2	0	0	1	0	1	0	0	0	1	0	0	3	4	1	1	1	2	1	0	1	2	0	1	3	4	0	1	1		1	0	0	1	1	0	0
1	0	23	1	1	0	0	1	50	0	0	0	0	0	0	0	0	0	0	0	0	1	0	0	0	0	2	1	1	1	2	0	0	1	1	0	1	3	4	2	0	0	1	1	0	1	0	0	1	0
1	0	17	1	0	1	0	1	61	0	0	0	0	0	0	0	2	0	0	0	0	1	0	0	0	1	4	0	0	0	2	0	0	1	1	0	1	3	1	0	0	0	1	0	0	0	2	1	0	0
1	0	39	1	0	1	0	2		0	2	0	0	0	0	0	2	0	0	0	0	1	1	1	1	1	3	1	1	1	2	2	0	2	2	0	0	3	4	0	0	0	0				0			0
1	0	26	1	0	0	0	1	85	0		0	0	0.0454545	0	0	1	1	0	0	0	1	0	0	0	0	0	1	1	1	2	1	0	1	1	0	0	3	4	2	1	0	1	1	0	0	1	1	0	1
1	0	37	1	0	0	0	1	55	0		0	0	0	0	0		0	0	0	0	1	0	0	0	0	4	0	1	1	2	0	0	2	1	0	1	3	4	0	0	0	1	1	0	1	2	1	0	0
1	0	27	1	0	0	0	1	79	0	2	0	0	0	0	0	3	0	0	0	0	1	0	1	0	0	4	0	0	0	1	0	0	2	0	0	1	3	0	0	0	0	0				0			0
1	0	23	1	1	0	0	1	67	0		0	0.153846	0.25	1	0		0	0	0	0	1	0	0	0	2	4														0	0	0				0			0
1	0	54	1	1	0	0	2			0	0																1	1	1	1	2	0	1	2	0	1	3	4	2	1	1		1	0	1	2	0	1	1
1	0	55	1	1	0	0	2	55	0	2	0	0	0.0909091	0	0	0	0	0	0	0	1	0	0	0	0	3	1	1	1	2	2	0	1	2	0	0	3	2	0	0	0	0				0			0
1	0	39	1	0	0	0	0	73	0		0	0	0.666667	0	0	0	0	0	0	0	1	0	0	0	0	0	1	1	1	2	1	0	2	1	0	1	3	4	2	1	1		0	0	1	0	0	1	0
1	0	21	1	0	0	0	0	79	0		0	0	0.368421	0	1	0	0	0	0	0	1	0	0	0	0		1	2	2	2	0	0	1	1	0	1	3	2	0	0	0	1	0	0	0	1	1	0	0
1	0	51	1	1	0	0	2	96	0		0	0	0	0	0	0	1	0	0	0	1	0	0	0	0	0	1	1	1	2	2	0	1	1	0	1	2	4	1	0	0	1	0	0	0	2	1	0	0
1	0	47	1	0	0	0	2	73	0	2	0	0	0.333333	0	0		0	0	0	0	1	1	0	1	0		1	2	2	2	1	0	2	2	0	0	3	1	0	1	0	0	1	0	0	1	1	0	0
1	0	18	1	1	0	0	2	67		0	0		0	0	0	1	0	0	0	0	1	0	0	0	0		1	1	1	2	0	0	1	2	0	1	3	4	2	0	0	1	1	0	1	2	1	0	0
1	0	21	1	1	0	0	2	67	0		1	0	0.0588235	0	0		0	0	0	0	1	0	0	0	2	4														1	1		1	0	0	1	0	1	0
1	0	36	1	0	0	0	2		1		0			1	0		0	0	0	0	1	0	0	0	0															0	0	0				0			0
1	0	40	1	0	0	0	1		0		0			0	0		0	0	0	0	0	1	1	0	0		0	1	1	2	1	0	2	1	1	0	3	3	0	0	0	0				0			0
1	0	29	1	1	0	0	0		0		0			0	0	3	0	0	0	0	1	1	1	1	0											1				0	0	1	0	0	0	2	1	0	0
1	0	32	1	0	0	0	0		0	2	0			1	0		0	0	0	0	1	1	1	1	0		1	0	0	1	1	0	1	1	0	1	1	1	0	0	0	0				0			0
1	0	18	1	0	0	0	0		0		0					0	0	0	0	0	1	0	0	0	0															0	0	0				0			0
1	0	36	1	0	0	0	2		0		0			0		1	0	0	1	0	0	0	0	0	0		0	0	0	1	0	0	2	0	0	1	3	1	0	0	0	0				0			0
1	0	23	1	0	0	0	0		0		0			1	0		0	0	0	0	1	0	0	0	0		1	1	1	2	1	0	2	0	0	1	3	2	0	0	0	1	1	0	1	1	0	1	0
1	0	48	1	1	0	0	1		0		0			0	0	1	0	0	0	0	1	0	0	0	0		0	1	1	2	2	0	1	2	0	0	3	4	1	0	1		1	0	0	2	1	0	0
1	0	23	1	1	0	0	2	67	0	2	0	0	0.2	0	0		0	0	1	0	1	0	0	0	0	4	0	1	1	2	1	0	1	2	0	1	3	3	1	0	0	0				0			0
1	0	33	1	1	0	0	2	68	0		0	0	0	0	0		0	0	0	0	1	1	0	1	0	3	0	1	1	2	2	0	1	1	0	1	3	4	0	0	0	0				0			0
0	0	24	0	0	0	0	2		0		0			0			0	0	1	0	0	1	0	0	0															0	0	0				0			0
1	1	16	1	0	0	0	0		0		0			0		3	0	0	0	0	1	1	1	1	0		2	2	2	2	1	0	2	1	0	1	3	4	2	0	0	1	1	1	1	0	0	1	0
1	0	29	1	1	0	0	2	73	0		0	0.111111	0.0769231	0	0		0	0	0	0	1	0	0	0	0	3	1	1	1	1	1	0	1	2	0	1	3	2	0	0	0	0				0			0
1	0	28	1	1	0	0	2	74	0		0	0	0	0	0		0	0	0	0	1	0	0	0	1	4														0	0	1	0	0	0	2	1	0	0
1	0	27	1	1	0	0	2		0	2	0	0	0.0588235	0	0		0	0	0	0	1	0	0	0	2	3	2	2	2	2	1	0	2	2	0	0	3	2	0	0	0	1	0	0	0	0	0	1	0
0	0	29	0	1	0	0	0	67	0		0	0	0.0833333	0	0		0	0	0	0	1	0	0	0	0	3	0	0	0	1	0	0	1	1	0	1	1	4	1	0	1		0	0	1	0	0	1	0
1	0	27	0	0	0	0	1	55	0		0	0	0.25	0	0		0	0	0	0	1	0	0	0	2	4														1	1		1	0	0	0	0	1	0
1	0	32	1	0	1	0	2		0		0	0.0909091	0.0714286	0	1		0	1	0	0	0	0	0	0	2	4	0	0	0	1	0	0	2	1	0	1	2	3	0	1	1		0	0	0	1	1	0	0
1	0	48	1	1	0	0	1	73	0	2	0	0.125	0.0714286	0	0												0	1	1	2	2	0	1	1	0	1	3	4	0	1	0	1	1	0	0	2	1	0	0
1	0	31	1	0	0	0	0	96	0		0	0.0333333	0.04	0	0		0	0	0	0	1	0	1	0		4	0	2	2	2	1	0	1	1	0	0	3	4	0	0	0	1	1	0	0	2	1	0	0
1	0	45	1	1	0	0	2	67	0	2	0	0		0	0	0	0	0	0	0	1	0	0	0	0	4	0	1	1	2	0	0	1	2	0	0	3	2	1	0	1		1	0	1	2	1	0	0
1	0	44	1	1	0	0	2	67	0		0	0.0714286	0.125	0	0		0	0	1	0	1	0	0	0	2	4	0	0	0	2	2	0	1	2	0	1	3	0	0	0	0	0				0			0
1	0	16	1	1	0	0	2		0		0	0		0	0												0	1	1	1	0	0	1	1	0	1	1	4	2	0	1		1	0	1	2	1	0	0
1	0	44	1	1	0	0	2	97	0	2	0	0	0	0	0	0	0	0	1	0	0	0	0	0	0	4	0	1	1	1	0	0	1	2	0	1	3	4	2	0	0	1	1	1	1	2	1	0	0
0	0	19	0	0	1	0	2	87	0	2	0	0.166667		0	0	2	0	0	0	0	1	0	0	0	0	0														0	0	0				0			0
1	0	45	1	1	0	0	2	71	0		0	0	0.363636	0	0		0	0	0	0	1	0	0	0	1	3	2	2	2	2	0	0	2	1	0	1	3	2	0	0	1		1	0	0	0	1	0	0
1	0	64	1	1	1	0	2	97	0		0	0	0	0	0	3	0	1	0	0	1	0	0	0	3	4	0	0	0	2	0	0	2	2	0	0	3	2	0	0	0	0				0			0
1	0	30	1	1	0	0	2	91	0	2	0	0.363636	0.5	0	0	3	1	0	0	0	1	0	0	0	0	4	0	2	2	2	2	0	1	2	0	1	3	4	1	0	0	1	1	0	1	2	1	0	0
1	0	28	1	0	0	0	2			0	0	0.2	0.25	1	0		0	0	0	0	1	0	0	0	1	0	0	1	1	2	0	0	2	1	0	1	3	3	0	0	0	0				0			0
1	1	25	1	0	0	0	1	73	0		0	0	0	0	0	0																				1				0	0	1				0	0	0	1
0	0	21	0	0	0	0	1	79	0	2	0	0	0	0	0												0	0	0	1	0	0	1	0	0	1	1	2	0	0	1		1	0	0	1	1	0	0
0	0	22	0	0	0	0	1	97	0		0	0.294118	0.111111	0	0		0	0	0	0	1	0	0	0	3	4														1	1		0	0	0	0	0	1	0
1	1	41	1	1	0	0	2	67	0		0		0.125	0	0		0	0	1	0	1	0	0	0	0	4	0	0	0	0	0	0	1	2	0	1	3	1	0	0	0	0				0			0
1	0	19	1	1	0	0	2	73	0		0	0	0	0	0		0	0	0	0	1	0	0	0	3	4	0	1	1	1	1	0	1	1	0	1	1	4	2	0	0	1	0	0	1	2	1	0	0
1	0	36	1	1	0	0	2	71	0		0	0.0666667	0.0769231	1	0		0	0	0	0	1	0	0	0	0	4	0	2	2	2	2	0	1	1	0	1	3	4	2	1	0	1	1	0	0	2	1	0	0
0	0	27	1	1	0	0	1	68	0		0	0	0.105263	0	0		0	0	0	0	1	0	0	0	0	4	0	1	1	2	1	0	1	1	0	1	2	1	1
1	0	32	1	0	0	0	2	78	0		0	0	0	0	0												0	1	1	1	0	0	1	1	0	1	1	4	0	0	1		1	0	1	1	0	1	0
1	0	20	1	0	0	0	2	79	0		0	0	0.0526316	0	0		0	0	0	0	1	0	0	0	0	4	0	1	1	1	0	0	2	1	0	1	3	2	0	0	0	1	1	0	1	2	1	0	0
1	0	25	1	1	0	0	2	91	0	2	0	0.222222	0.0909091	1	0		0	0	0	0	1	0	1	0	2	4														0	0	1	1	0	0	1	1	0	0
1	0	23	1	0	0	0	2	62	0		0	0	0.277778	0	1												1	1	1	2	0	0	1	0	0	0	3	4	0	1	1		1	0	0	1	1	0	0
1	0	38	1	1	0	0	1	85	0		0	0	0.5	0	0												0	2	2	2	0	0	0	1	0	1	3	2	0	1	0	1	1	0	0	2	1	0	0
1	0	21	1	0	0	0	2	79	0	0	0	0.428571	0.230769	1	0		1	0	0	0	0	0	0	0	0	0	1	1	1	2	0	0	1	1	0	1	3	4	2	0	1		1	0	1	1	0	1	0
1	0	39	1	0	0	0	2		0		0	0.125	0.333333	1	0	0	1	0	0	0	1	0	0	0	0	3	0	1	1	2	1	0	1	1	0	1	3	2	0	0	0	0				0			0
1	0	39	1	1	0	0	2	85	0	2	0	0	0	0	0		0	0	1	0	1	0	0	0	0	0	0	1	1	1	1	0	0	1	0	0	1	4	0	0	1		1	0	0	2	0	1	0
0	0	37	1	1	0	0	0		0		0			0			0	0	0	0	1	1	0	1	0		0	2	2	2	2	0	2	2	0	0	3	3	1	1	0	0	0	0	0	0	0	0	0
1	0	22	1	1	0	0	2		0		0			0	0	3	0	0	1	0	1	0	0	0	3															1	1		1	0	0	0	0	1	0
1	0	31	1	1	0	0	0		0		0			0		3	0	0	0	0	1	0	0	0	0		1	1	1	2	2	0	2	1	0	1	3	2	1	0	0	1	1	0	0	2	1	0	0
1	0	34	0	0	0	0	2		0		0			0		3	0	0	0	0	1	1	1	1	0		1	0	0	1	0	0	1	0	0	1	1	4	2	1	1		0	0	1	0	0	1	0
1	0	24	1	1	0	0	2		0		0	0.714286	1	1	1		0	0	0	0	0	0	0	0	0	4	1	1	1	2	1	0	2	1	0	0	3	4	0	0	0	1	1	0	1	2	1	0	0
1	0	46	1	1	0	0	0		0		0			0	0	3	0	0	1	0	1	0	0	0	0															0	0	0				0			0
1	0				0	0	0		0		0			1		2	0	0	0	1	0	0	0	0	0															0	0	0				0			0
1	0	46	1	1	0	0	2	73	0	2	0	0.230769	0.625	1	1		0	1	0	0	1	0	0	0	2	4	2	2	0	2	2	0	2	2	0	0	3	2	0	1	0	0	0	0	0	1	1	0	0
1	0	36	1	1	0	0	2	79	0		0	0	0.047619	0	0	0	0	0	0	0	1	0	0	0	2	4	0	2	2	2	0	0	0	2	0	0	3	4	2	0	0	0				0			0
1	0	37	1	0	0	0	2	60	0	2	0	0	0.388889	0	0										0		0	1	1	2	0	0	2	1	0	0	3	2	0	0	0	1	0	0	0	1	1	0	0
1	0	24	1	1	0	0	1	85	0		0	0	0.1875	0	0		0	0	0	0	1	0	0	0	0	3	1	1	1	2	1	0	2	2	0	1	3	2	2	0	0	1	0	0	0	2	1	0	0
1	0	19	1	0	0	0	2	73	0		0	0	0.230769	0	1		0	0	0	0	1	0	1	0	2	4	2	2	2	2	0	0	2	2	0	1	2	4	1	1	1		0	0	0	1	1	0	0
1	0	23	1	1	0	0	0	97	0		0	0	0	0	0		0	0	0	0	1	0	0	0	3	4	0	1	1	1	1	0	1	1	0	1	1	4	0	0	0	0				0			0
1	0	21	1	1	0	0	1		0		0	0		0	0		0	0	1	0	1	0	0	0	2	4	0	1	1	1	0	0	1	1	0	1	1	2	0	0	0	1	0	0	0	0	0	1	0
1	0	43			0	0	1	79	0		0	0	0	0	0		0	0	0	0	1	0	0	0	2	3														0	0	0				0			0
1	0	17	1	0	0	0	0	61	0	1	0	0	0.0666667	0	0	0	0	0	1	0	1	0	0	0	1	3	0	0	0	2	0	0	2	0	0	0	3	0	0	0	0	1	0	0	0	2	1	0	0
1	0	26	1	0	0	0	0	79	0		0	0	0	0	0		0	0	0	0	1	0	0	0	1	3	2	2	2	2	0	0	1	0	0	1	2	4	2	1	0	0	1	0	1	0	0	1	0
1	0	29	1	0	0	0	0	79	0		0	0	0.444444	0	0		0	0	1	0	1	0	0	0	2	3	0	1	1	2	0	0	1	0	0	1	2	2	0	0	0	0				0			0
1	0	25	1	1	0	0	0		0		1			0	0		0	0	0	0	1	0	0	0	2	2	1	1	1	2	0	0	1	2	0	1	3	4	2	0	0	0				0			0
1	0	47	1	0	0	0	1	79	0	2	0	0	0.416667	0	1		0	0	1	0	0	0	0	0	2	3	2	2	2	2	1	0	2	1	0	1	3	3	0	0	0	1	0	0	0	2	1	0	0
1	1	51	1	1	0	0	1	84	0	2	0	0	0.266667	0	0		0	0	0	0	1	0	0	0	0	4	0	1	1	1	1	0	1	2	0	0	2	4	2	1	0	1	1	0	0	2	0	1	0
1	0	20	1	1	0	0	0	64	0		0	0.214286	0.384615	0	0	1	0	0	0	0	1	0	0	0	2	3	0	1	1	1	0	1	1	1	0	1	1	4	1	0	0	0				0			0
1	0	20	1	1	0	0	1	73	0		0	0.133333	0.0666667	0	0		0	0	0	0	1	0	0	0	1	4	0	2	2	2	1	0	2	0	0	1	3	3	2	0	1		0	0	0	0	0	1	0
1	0	29	1	1	0	0	1	85	0		0	0.125	0.142857	1	1		0	0	0	0	1	0	0	0	2	4	0	0	1	2	1	0	1	0	0	1	3	4	0	1	1		1	1	0	0	0	1	0
1	0	60	1	1	0	0	1		0		0	0		0	0		0	0	0	0	1	1	0	1	0	4	0	2	2	2	1	0	2	2	0	1	3	4	2	0	0	1	1	0	1	1	0	1	0
1	0	20	1	1	0	0	0	104	0		0	0	0.111111	0	0		0	0	0	0	1	0	0	0	1	3	0	2	2	2	0	0	1	1	0	1	3	3	2	0	0	0				0			0
1	0	41	1	1	1	0	2	103	0		0		0.0666667	0	0		0	0	0	0	1	0	0	0	1	4	1	2	1	2	2	0	2	2	0	0	3	4	1	1	1		1	1	1	1	1	0	0
0	0	46	1	0	0	0	2		0		0	0	0	0	0		0	0	0	0	1	0	0	0	0	3	1	0	0	2	1	0	1	1	0	1	3	3	1	1	0	0	0	0	0	2	1	0	0
0	0	25	1	0	1	0	2	80	0		0	0		0			0	0	0	0	1	0	0	0	2	4	0	0	1	2	0	0	2	1	0	1	3	2	0	1	0	1	1	0	1	2	1	0	0
0	0	24	1	0																							0	0	0	2	2	0	1	1	0	1	3	2	0	0	0	1	1	0	0	2	0	1	0
0	0	34	1	0	0	0	1	67	0		0	0.111111	0	0	0		0	0	0	0	1	0	0	0	1	4	2	2	2	2	2	0	2	2	0	0	3	2	0	1	0	1	1	1	0	2	1	0	0
1	0	28	1	1	0	0	0		0		0			0	0		0	0	1	0	0	0	0	0	0		0	2	2	2	1	0	1	1	0	1	3	4	0	0	0	0				0			0
1	0	23	1	1	0	0	0		0		0			0	0	3									0	4														0	0	0				0			0
1	0	17	1	1	0	0	0		0		0			0			0	0	0	0	1	0	0	0	0		2	2	2	2	1	0	2	1	0	0	3	4	2	0	0	1	1	1	1	1	0	1	0
1	0	20	1	0	0	0	0		0		0	0.2		1			0	0	0	0	0	1	1	0	0		1	1	1	2	0	1	1	1	0	1	3	4	2	0	0	0				0			0
1	0	27	1	1	0	0	0		0		1			0	0	3									0	4	0	2	2	2	0	0	1	2	1	1	3	3	2	0	0	0				0			0
1	1	11	1	0	0	0	2	67	0	2	0	0.0714286	0.214286	1	0	0											0	0	0	2	0	0	1	0	0	1	3	0	0	1	1		0	0	0	2	1	0	0
1	0	24	1	0	0	0	2	85	0		0	0	0.238095	0	0		1	0	0	0	1	0	0	0	0	3	0	0	0	2	0	0	1	0	0	1	2	2	0	0	1		0	1	0	0	0	1	0
1	0	21	1	1	0	0	2	85	0		0	0	0	0	0	3	0	0	0	0	1	1	0	1	0	3	1	2	2	2	0	0	1	1	0	1	2	2	2	0	0	1	1	0	0	2	1	0	0
1	0	47	1	0	1	0	2	73	0		0	0	0.111111	0	0	2	0	0	0	0	1	0	0	0	0	4	0	1	1	2	0	0	1	1	0	1	2	3	0	1	1		1	1	0	0	0	1	0
1	0	56	1	1	1	0	2		0		0	0	0	0	0		0	0	0	0	1	0	0	0	3	0	1	1	1	2	1	0	2	1	0	0	3	4	0	1	0	1	1	0	0	2	1	0	0
1	0	22	1	1	1	0	2		0	2	0	0	0.111111	0	0		0	0	0	0	1	1	0	1	0	2	1	0	0	2	0	0	1	1	0	0	1	3	0	0	0	0				0			0
1	0	37	0	0	0	0	2	60	0		0	0	0.333333	0	0		1	0	0	0	1	0	0	0	0	4	1	1	1	1	1	0	2	1	0	1	3	4	2	1	0	1	1	1	0	1	0	1	0
1	0	25	1	1	0	0	2		0		0	0	0	0	0	0	0	0	1	0	1	0	0	0	0	0	0	0	1	1	0	0	1	1	0	1	1	2	1	0	0	1	1	1	0	2	0	0	0
1	0	48	1	0	0	0	1	60	0		0	0.0666667	0	0	0		0	0	0	0	1	1	0	1	0	3	0	0	0	2	0	0	1	0	0	0	3	2	0	0	0	0				0			0
1	0	44	1	1	0	0	2	54	0		0	0.142857		0			1	0	0	0	1	0	0	0	0	3	0	1	0	2	0	0	1	1	0	0	3	2	0	1	0	0	1	0	0	1	0	1	0
1	0	30	1	1	0	0	0		0		0			0	0		0	0	0	0	1	1	0	1	0															0	0	0				0			0
1	0	32	1	0	0	0	1	91	0		0	0	0.333333	0	0		0	0	1	0	1	0	0	0	2	4	1	1	1	2	0	0	2	1	0	1	3	4	0	1	1		1	0	0	0	0	1	0
1	0	41	1	1	0	0	2		0		0			0	0		0	0	0	0	1	0	0	0	0															0	0	1	1	0	0	2	1	0	0
0	0	57	1	0	0	0	2	79	0	2	0	0.4375	0.416667	1	0		0	0	0	0	1	0	0	0	0	0	2	2	2	2	2	0	2	2	0	0	3	1	0	1	0	1	1	0	0	2	1	0	0
1	0	39	1	0	1	0	1	60	0	0	0	0	0	0	0		0	1	0	0	1	0	0	0	3	4	0	1	1	2	0	0	2	2	0	1	2	1	0	0	0	0				0			0
1	0	48	1	0	0	0	1	66	0	0	1	0.117647	0.0555556	1	1		0	0	0	0	1	0	0	0	0	4	0	1	0	2	0	1	1	0	0	1	3	2	0	0	0	0				0			0
1	0	42	1	0	0	0	1	67	0		0	0	0.181818	0	0		0	0	0	0	1	0	1	0	0	3	0	0	0	2	0	0	2	0	0	1	3	1	0	1	0	1	1	0	0	2	1	0	0
1	0	40	1	1	0	0	2	67	0		0	0	0	0	0		1	0	0	0	0	0	0	0	0	1	0	0	0	2	1	0	1	2	0	1	3	3	0	0	0	0				0			0
1	0	23	1	0	0	0	1	61	0	1	0	0.0666667	0	0	0	3	0	0	0	1	1	0	1	0	2	4	1	1	1	2	1	0	1	1	0	0	3	2	0	1	0	0	1	0	0	1	0	1	0
1	0	18	1	1	0	0	1	63	0		1	0.176471	0.111111	1	1	3	0	0	0	0	1	0	1	0	2	4	1	1	1	2	0	0	1	0	0	1	3	4	2	0	0	1	1	0	0	2	1	0	0
1	0	48	1	1	1	0	2	73	0		0	0	0	0	0		1	0	0	0	1	0	0	0	0	2	1	1	1	2	2	0	1	2	0	1	3	4	0	1	0	1	1	0	0	2	0	0	0
1	0	34	1	0	0	0	1	73	0		1	0.263158	0.15	1	1	2	0	0	0	0	1	1	0	1	1	4														1	0	0	1	0	0	0	0	1	0
1	0	35	1	0	0	0	1	93	0	0	0	0	0	0	0	2	0	0	0	0	1	0	0	0	1	4	1	1	1	2	2	0	1	1	0	1	3	1	0	0	0	1	1	0	1	2	1	0	0
1	0	62	1	0																							2	2	2	2	2	0	2	2	0	0	3	4	2	0	0	1	1	0	0	2	1	0	0
1	0	40	1	0	0	0	1	60	0	2		0	0	0	0	1	0	0	0	0	1	1	1	1	0	1	0	0	0	2	1	0	2	1	0	1	3	0	0	0	0	1	1	0	0	2	1	0	0
1	0	34	1	1	0	0	1	50	0	0	0	0	0.37037	0	0	1	0	0	0	0	1	0	0	0	0	4	0	1	1	2	1	0	2	2	0	1	3	2	2	0	0	1	1	1	1	1	0	0	0
1	0	21	1	0	0	0	2	67	0	2	0	0	0	0	0		0	0	1	0	0	0	0	0	1	4	0	1	1	2	0	1	2	0	0	0	3	2	0	0	0	0				0			0
1	0	26	1	1	0	0	1	79	0	2	0	0	0	0	0	2	0	0	0	0	1	1	0	1	0	3	0	1	1	2	2	0	2	0	0	1	3	3	1	0	0	0				0			0
1	0	20	1	1	0	0	1	67	0	0	0	0	0	0	0	3	0	0	0	0	1	0	0	0	0	2	1	1	1	1	1	0	1	0	1	1	1	3	0	1	0	0	1	0	0	2	0	0	0
1	0	30	1	1	0	0	0	48	0	0	1	0.153846	0.0526316	1	1	1	0	1	0	0	1	0	0	0	2	2	1	2	2	2	0	1	2	1	0	0	3	4	2	0	0	0				0			0
1	0	30	1	1	0	0	1	48	0	2	0	0	0	0	0		0	0	0	0	1	1	0	1	0	2	1	2	1	2	2	0	2	2	0	1	3	1	0	0	0	0				0			0
1	1	20	1	1	0	0	2	73	0		0	0.0769231	0.0909091	0	0		0	0	0	0	1	0	0	0	2	4	1	1	1	2	0	0	2	2	0	1	2	4	2	0	0	0				0			0
1	1	27	1	1	0	0	1	67	0	2	0	0	0.111111	0	0		0	0	0	0	1	0	0	0	2	4	1	1	1	2	1	0	1	2	0	0	2	4	0	1	0	0	1	0	0	1	0	1	0
1	0	40	1	0	0	0	2	79	0	2	0	0	0	0	0	0	0	0	0	0	0	0	0	0	2	4	0	1	0	2	1	0	1	2	0	0	3	2	0	1	0	1	1	0	0	1	0	0	0
0	0	22	0	0																							0	0	0	0	0	1	1	0	0	1	1	2	0	0	0	0				0			0
0	0	22	0	0	0	0	0	73	0	1	0	0.0555556	0.227273	1	0	0	0	0	1	0	1	0	0	0	0	2														0	0	0				0			0
1	0	25	1	0	0	0	0	49	0	1	0	0	0	0	0	0	1	0	0	0	1	0	0	0	0	3														1	1		0	0	0		0	1	0
0	1	33	1	0	0	0	0	85	0	2	0	0	0.133333	0	0	0	1	0	0	0	1	0	0	0	0	3														1	1		1	0	0		0	1	0
1	0	20	1	0	0	0	0	67	0	0	0	0	0	0	0	3	0	0	0	0	1	1	1	1	2	3	0	1	1	1	0	0	2	1	0	1	2	2	0	0	0	1	1	0	1	2	1	0	1
1	0	40	1	1	0	0	1	85	0	0	0	0	0	0	0	2	0	0	0	0	1	0	0	0	2	4	0	1	1	2	2	0	2	1	0	0	3	4	2	0	0	1	0	0	0	2	1	0	1
1	0	28	1	0	0	0	0	63	0	2	0	0	0.25	0	0	3	1	0	0	0	1	1	0	1	2	4	1	1	1	2	2	0	2	2	0	0	3	1	0	0	0	1	1	0	0	1	1	0	0
1	0	41	1	0	0	0	0	67	0	0	0	0	0.222222	0	0	1	1	0	0	0	1	1	0	1	0	3	2	2	2	2	2	0	2	2	0	0	3	2	0	0	0	1	0	0	0	2	1	0	1
1	0	26	1	0	0	0	0	61	0	2	0	0.307692	0.222222	1	1		0	0	1	0	1	1	0	1	0	4	2	2	2	2	2	0	2	2	0	0	2	4	1	1	0	0	1	0	0	1	1	0	1
1	0	48	1	1	0	0	1	73	0	2	0	0.466667	0.571429	1	1		0	0	1	0	1	0	0	0	1	3	1	1	1	2	2	0	1	2	0	0	3	4	0	0	0	1	1	0	0	2	1	0	1
1	1	24	1	0	0	1	2	36	0		1	0	0.15	0	0	3	0	1	1	0	1	0	0	0	3	4	2	1	1	2	1	0	2	1	0	1	3	2	0	0	0	1	1	0	0	2	1	0	0
1	0	50	1	0	0	0	1	80	0		0	0		0	0		0	0	0	0	1	1	0	1	2	4	0	0	0	2	0	0	2	1	1	1	3	1	0	1	0	0	0	0	0	2	1	0	1
1	0	50	1	1	0	0	1	77	0	0	0	0	0.3125	0	1		0	0	1	0	0	0	0	0	0															1	0	1	1	0	0	1	1	0	0
1	0	32	1	0	0	0	1	61	0	2	0	0	0	0	0	3	0	0	0	0	1	0	0	0	0	3	0	1	1	1	0	0	1	0	0	1	1	4	0	0	0	1	1	0	0	1	0	1	0
1	0	20	1	1	1	0	1	67	0	2	0	0	0.15	0	0		1	0	0	0	1	0	0	0	0	3	2	2	2	2	2	0	2	1	0	1	2	4	2	1	0	0	1	0	1	1	1	0	0
1	0	29	1	0	0	0	0		0	0	0	0	0.0526316	0	0	2	0	0	0	0	0	0	0	0	0	4	0	0	0	2	0	0	1	0	0	1	3	0	0	0	0	0				0			0
1	0	39	1	0	0	0	1	61	0		0	0	0.142857	0	0		0	0	0	0	1	0	0	0	1	3	1	1	1	2	0	1	1	1	0	1	2	2	0	1	0	0	1	0	0	1	0	1	0
1	0	39	1	1	0	0	1		0		0	0	0.1875	0	0		1	0	0	0	1	0	0	0	0	0	0	1	1	1	2	1	1	2	0	1	3	4	1	0	0	0				0			0
0	1	22	0	0	0	0	1	79	0	0	0	0	0.0714286	0	0		0	1	1	0	0	0	0	0	2	4	0	0	0	1	0	0	1	0	0	1	1	2	1	1	0	0	1	1	0	1	0	1	0
1	0	19	1	1	1	1	0	79	0		1	0	0	0	0	0	0	0	0	0	1	0	0	0	0		0	0	0	2	0	0	0	1	0	1	3	3	2	0	0	1	1	0	1	2	1	0	0
0	0	53	1	0	0	0	1	67	0		0	0	0	0	0	0	0	0	0	0	1	0	0	0	0	1	0	0	0	2	2	0	1	2	0	0	3	3	1	0	0	0				0			0
0	0	22	0	0	0	0	1	73	0	0	0	0	0	0	0		0	0	0	1	1	0	0	0	0	3	0	1	0	1	0	0	1	0	0	0	1	1	0	1	1		1	0	0	0	0	1	0
1	0	24	1	1	0	0	1	115	0	2	0	0	0.111111	0	0		0	0	1	0	1	0	0	0	0	3	0	1	1	2	1	0	2	1	0	0	3	2	0	0	0	1	1	0	0	2	1	0	0
1	0	20	1	1	0	0	0	73	0		1	0	0	0	0		0	0	0	0	1	0	0	0	0	3	0	1	1	1	2	0	2	1	0	0	2	2	0	0	0	0				0			0
1	0	62	1	0	0	0	1	79	0		0	0	0	0	0		0	0	1	0	1	0	0	0	0	3	1	1	1	2	0	0	2	1	0	0	3	4	0	0	0	0				0			0
1	0	33	1	0	0	0	1	61	0		0	0	0.05	0	0		0	0	0	0	1	0	0	0	0	3	1	1	1	2	1	0	2	0	0	0	2	2	0	0	0	0				0			0
1	0	31	1	1	0	0	1	67	0	2	0	0	0.0833333	0	0	0	0	0	0	0	1	0	0	0	0	3	1	0	0	1	0	0	1	1	0	1	1	1	0	0	0	0				0			0
1	0	34	1	1	0	0	0	55	0	1	0	0	0.2	0	0		0	0	0	0	1	0	0	0	2	3	0	1	1	2	2	0	1	1	0	1	3	4	0	0	0	0				0			0
1	0	20	1	1	0	0	1	61	0	2	0	0	0.0909091	0	0		0	0	0	0	1	0	0	0	0	3	1	1	1	1	0	1	1	1	0	1	1	3	0	0	0	0				0			0
1	0	36	1	1	0	0	2	79	0		0			0	0	0	0	0	0	0	1	0	0	0	0	3	1	1	1	2	2	0	1	1	0	1	2	2	0	1	0	1	1	0	0	2	1	0	1
0	0	60	1	0	0	0	0	49	0		0	0	0	0	0		0	0	0	0	1	1	0	1	3	3	2	2	2	2	0	0	2	1	0	0	3	2	2	0	0	0				0			0
1	1	58	1	1	0	0	1	92	0	2	0	0.2	0.25	0	0	2	0	0	0	0	1	0	0	0	2	2														0	0	0				0			0
1	1	23			1	0	2	55	0	2	0	0	0	0	0	0	0	0	0	0	1	0	0	0	0	3														1	0	1	1	1	1	2	1	0	1
0	1	41			0	0	2	79	0	2	0			0	0	0	1	0	0	0	1	0	0	0	0	3														0	0	0				0			0
1	0	34			0	0	1	73	0		0	0	0	0	0		0	0	1	0	1	1	0	1	0	3										0				1	0	1	1	0	0	2	0	0	0
0	0	20	1	0	1	0	2	79	0	2	0	0	0	0	0		0	0	0	0	1	1	0	1	0	3
0	1	23	0	0	0	0	1	85	0	2	0	0.0909091	0	1	0		0	0	0	0	0	1	0	0	0	4
0	0	28	1	1	0	0	2	97	0	2	0	0.2	0.181818	1	1		0	0	0	0	1	0	0	0	0	3
0	0	23	1	0	0	0	2	85	0			0	0.6	0	1	0	0	0	0	0	1	0	0	0	0	4
0	0	35	1	1	0	0	2	67	0		0	0	0	0	0		0	0	1	0	1	0	0	0	2	4
0	0	24	1	0	1	0	2	61	0		0			0	0		0	0	1	0	0	0	0	0	0	4
0	0	46			1	0	2	67	0		0	0	0.25	0	0	3	0	0	0	0	1	0	1	0	0	1
0	0	29	1	1	0	0	2	65	0	2	0	0	0	0	0
0	0	37	0	0
[truncated: 9 more columns]
